# Supplementary material for: Polyoxometalate-based organic–inorganic hybrids for stabilization and optical switching of the liquid crystal blue phase
Source: Royal Society of Chemistry journal article supplement (doi:10.1039/c5tc00395d), 2015-01-01
Supplement: c5tc00395d1.pdf [file c5tc00395d1.pdf]

## Supporting Information

### **Polyoxometalate-based Organic-Inorganic Hybrids for Stabilization and Optical Switching of Liquid Crystal Blue Phase**

Jiao Wang,<sup>1‡</sup> Chang-Gen Lin,<sup>2‡</sup> Junyan Zhang,<sup>1</sup> Jie Wei,<sup>1</sup> Yu-Fei Song,<sup>2\*</sup> Jinbao Guo<sup>1\*</sup>

<sup>1</sup>College of Materials Science and Engineering, Beijing University of Chemical Technology, Beijing 100029, P. R. China.

<sup>2</sup>State Key Laboratory of Chemical Resource Engineering, Beijing University of Chemical Technology, Beijing 100029, P. R. China.

<sup>‡</sup>These authors contributed equally to this work.

Corresponding authors: [guojb@mail.buct.edu.cn](mailto:guojb@mail.buct.edu.cn)

[songyf@mail.buct.edu.cn](mailto:songyf@mail.buct.edu.cn)

## 1 Synthesis and Characterization of POM Hybrids

**Chemical materials:** All chemicals were purchased from Alpha Aesar and used as received. Acetonitrile and chloroform were distilled from CaH<sub>2</sub> prior to use.

$[(C_4H_9)_4N]_4[(SiW_{11}O_{39})O\{Si(CH_2)_3NH_2\cdot HCl\}_2]$  (**SiW<sub>11</sub>-NH<sub>2</sub>**), 4-octyloxyazobenzoic acid, and 4-octyl-oxyazophenol were prepared according to the published procedure and fully characterized.<sup>1,2</sup>

**Measurements:** <sup>1</sup>H-NMR, <sup>13</sup>C-NMR, and <sup>29</sup>Si-NMR spectra were obtained on a Bruker AV400 NMR spectrometer at resonance frequency of 400 MHz. Fourier transform infrared (FT-IR) spectra were carried out on a Bruker Vector 22 infrared spectrometer using KBr pellet method. Electrospray ionisation mass spectra (ESI-MS) were recorded on a Xevo G2 QT ESI-MS calibrated using a 5 mM sodium formate solution in 90:10 2-propanol:water, and all experiments were performed in negative mode using acetonitrile as solvent. Elemental Analyses were completed by using varioEL cube from Elementar Analysensysteme GmbH.

### Synthesis of POM Hybrid 1

$[(C_4H_9)_4N]_4[(SiW_{11}O_{39})O\{Si(CH_2)_3NHCOC_6H_4N_2C_6H_4OC_8H_{17}\}_2]$  (**POM Hybrid**

**1**): **POM Hybrid 1** was prepared according to our previous work.<sup>3</sup> Yield: 76.90%.

<sup>1</sup>H-NMR (CD<sub>3</sub>CN-*d*<sub>3</sub>, ppm): δ = 0.80 (t, 4H), 0.92 (t, 6H), 1.00 (t, 48H), 1.39 (m, 48H), 1.52 (m, 4H), 1.66 (m, 32H), 1.84 (m, 4H), 1.93 (m, 4H), 3.16 (t, 32H), 3.52 (m, 4H), 4.14 (m, 4H), 7.43 (t, 2H), 7.84 (m, 8H), 7.95 (m, 8H). <sup>13</sup>C-NMR (CD<sub>3</sub>CN-*d*<sub>3</sub>, ppm): δ = 8.10, 9.61, 12.59, 13.08, 19.06, 22.06, 23.08, 25.32, 28.66, 31.24, 41.65, 46.96, 58.02, 64.95, 69.17, 112.85, 122.05, 124.89, 127.97, 156.82, 158.01, 165.90.

$^{29}\text{Si}$ -NMR ( $\text{CD}_3\text{CN}-d_3$ , ppm):  $\delta = -52.00, -84.69$ . FT-IR (KBr,  $\text{cm}^{-1}$ ):  $\nu = 3413, 2970, 2932, 2873, 1645, 1586, 1532, 1485, 1380, 1249, 1186, 1046, 967, 949, 903, 856, 802, 755, 532$ . Elemental analysis (%) calcd for  $\text{C}_{112}\text{H}_{208}\text{N}_{10}\text{O}_{44}\text{Si}_3\text{W}_{11}$  (4505.39): C 29.83, H 4.62, N 3.11; found: C 29.19, H 4.39, N 3.09.

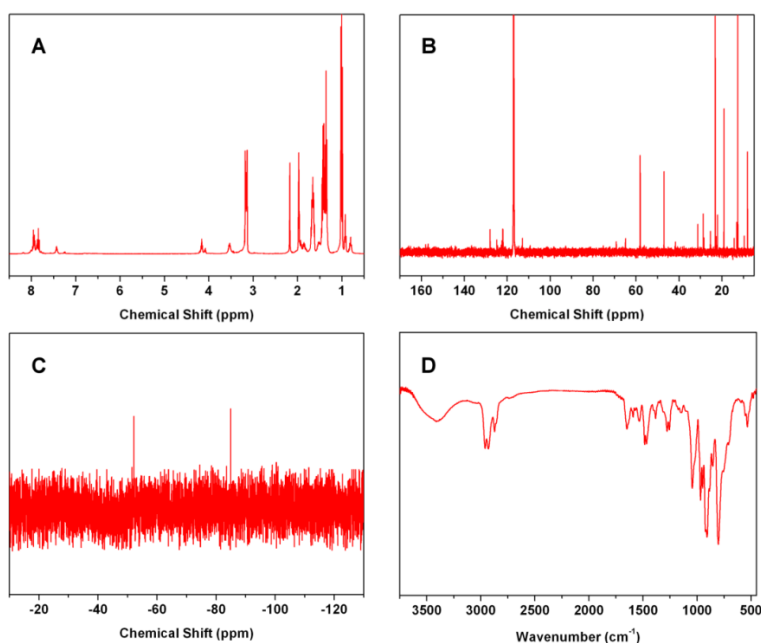

**Figure S1.**  $^1\text{H}$ -NMR (A),  $^{13}\text{C}$ -NMR (B),  $^{29}\text{Si}$ -NMR (C), and FT-IR (D) spectra of

POM Hybrid 1

### Synthesis of POM Hybrid 2

**4-(12-bromododecyloxy)-4'-octyloxyazobenzene (3):** 4-octyloxyazophenol (3.26 g, 10 mmol) was added to a solution of 1,12-dibromododecane (6.56 g, 20 mmol) and  $\text{K}_2\text{CO}_3$  (4.14 g, 30 mmol) in 150 mL acetone. The reaction mixture was refluxed for 24 hours. After removing the solvent under vacuum, the residue was dissolved in chloroform. Organic phase was washed with water, dried over anhydrous  $\text{Na}_2\text{SO}_4$ , and then evaporated. The crude product was purified by column chromatography on silica gel using petroleum ether/acetic ether (2:1, v/v) as eluent. Yield: 51.6%.  $^1\text{H}$ -NMR

(CDCl<sub>3</sub>, ppm):  $\delta$  = 0.89 (t, 3H), 1.29 (m, 20H), 1.48 (m, 6H), 1.82 (m, 6H), 3.41 (t, 2H), 4.03 (t, 4H), 7.00 (d, 4H), 7.86 (d, 4H). <sup>13</sup>C-NMR (CDCl<sub>3</sub>, ppm):  $\delta$  = 161.16, 146.95, 124.29, 114.67, 68.35, 34.06, 32.85, 31.82, 29.53, 29.37, 29.23, 28.77, 28.18, 26.04, 22.67, 14.11.

**Methyl-3,5-bis((12-(4-((4-(octyloxy)phenyl)diazenyl)phenoxy)dodecyl)oxy)**

**benzoate (4): 3** (1.27 g, 2.2 mmol) was added to a solution of methyl 3,5-dihydroxybenzoate (168 mg, 1 mmol), K<sub>2</sub>CO<sub>3</sub> (470 mg, 3.3 mmol), and a catalytic amount of KI in butan-2-one 25 mL. The mixture was stirred at reflux for 36 hours and then butan-2-one was evaporated. The residue was washed with petroleum ether and methanol successively for several times. The product was obtained after recrystallization in acetone. Yield: 72%. <sup>1</sup>H-NMR (CDCl<sub>3</sub>, ppm):  $\delta$  = 0.89 (t, 6H), 1.30 (m, 40H), 1.47 (m, 12H), 1.79 (m, 12H), 3.89 (s, 3H), 3.96 (t, 4H), 4.03 (t, 8H), 6.63 (s, 1H), 6.98 (d, 8H), 7.15 (s, 2H), 7.86 (d, 8H). <sup>13</sup>C-NMR (CDCl<sub>3</sub>, ppm):  $\delta$  = 167.01, 161.18, 160.16, 146.93, 131.83, 124.30, 114.67, 107.63, 106.60, 68.33, 52.19, 31.82, 29.56, 29.37, 29.23, 29.19, 26.03, 22.67, 14.11.

**3,5-bis((12-(4-((4-(octyloxy)phenyl)diazenyl)phenoxy)dodecyl)oxy)benzoic acid**

**(5): 4** (1.15 g, 1 mmol) and KOH (700 mg, 12.5 mmol) were dissolved in THF/EtOH (1:1, v/v) 100 mL, and heated at 78 °C for 4 hours. After evaporating the solvent under reduce pressure, the residue was suspended in 100 mL H<sub>2</sub>O and adjusted pH value to 1. The solid compound was collected by filtration and dried in the air. Yield: 98%. <sup>1</sup>H-NMR (CDCl<sub>3</sub>, ppm):  $\delta$  = 0.92 (t, 6H), 1.33 (m, 40H), 1.49 (m, 12H), 1.84 (m, 12H), 4.00 (t, 4H), 4.04 (t, 8H), 6.71 (s, 1H), 7.00 (d, 8H), 7.24 (s, 2H), 7.88 (d, 8H).

$^{13}\text{C}$ -NMR ( $\text{CDCl}_3$ , ppm):  $\delta = 170.01, 161.17, 160.22, 146.94, 130.81, 124.30, 114.67, 108.14, 107.34, 68.34, 31.82, 29.56, 29.37, 29.23, 29.16, 26.04, 22.67, 14.11$ .

$[(\text{C}_4\text{H}_9)_4\text{N}]_4[(\text{SiW}_{11}\text{O}_{39})\text{O}\{\text{Si}(\text{CH}_2)_3\text{NHCOC}_6\text{H}_3(\text{O}(\text{CH}_2)_{12}\text{OC}_6\text{H}_4\text{N}_2\text{C}_6\text{H}_4\text{OC}_8\text{H}_{17})_2\}_2$

]**(POM Hybrid 2)**: Yield: 80%.<sup>3</sup>  $^1\text{H}$ -NMR ( $\text{CDCl}_3$ , ppm):  $\delta = 0.91$  (t, 16H), 1.00 (t, 48H), 1.31 (m, 80H), 1.50 (m, 56H), 1.69 (m, 32H), 1.82 (m, 24H), 2.03 (m, 4H), 3.32 (t, 32H), 3.71 (m, 4H), 4.03 (m, 24H), 6.50 (s, 2H), 7.00 (d, 16H), 7.87 (d, 16H).

$^{13}\text{C}$ -NMR ( $\text{CDCl}_3$ , ppm):  $\delta = 166.68, 161.22, 160.17, 146.90, 124.29, 114.66, 105.10, 68.38, 58.61, 31.82, 29.70, 29.65, 29.62, 29.45, 29.37, 29.24, 26.04, 24.02, 22.66, 19.72, 15.28, 14.11, 13.86$ .  $^{29}\text{Si}$ -NMR ( $\text{CDCl}_3$ , ppm):  $\delta = -51.42, -84.97$ . FT-IR (KBr,  $\text{cm}^{-1}$ ):  $\nu = 3404, 2926, 2858, 1648, 1593, 1535, 1468, 1385, 1321, 1249, 1156, 1113, 1040, 956, 908, 848, 803, 756, 545$ . Elemental analysis (%) calcd for  $\text{C}_{212}\text{H}_{360}\text{N}_{14}\text{O}_{54}\text{Si}_3\text{W}_{11}$  (6075.68): C 41.87, H 5.92, N 3.22; found: C 41.36, H 5.59, N 3.02.

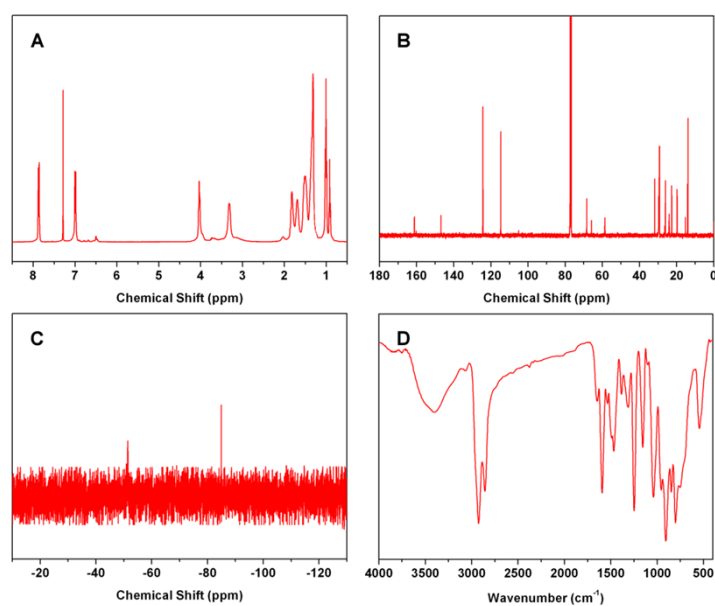

**Figure S2.**  $^1\text{H}$ -NMR (A),  $^{13}\text{C}$ -NMR (B),  $^{29}\text{Si}$ -NMR (C), and FT-IR (D) spectra of

POM Hybrid 2

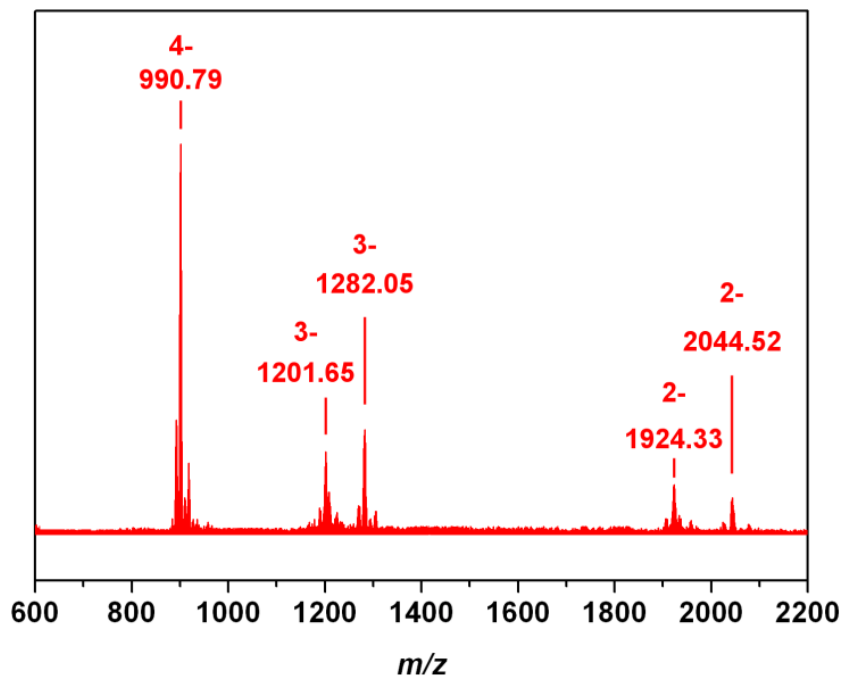

**Figure S3.** ESI-MS spectrum of POM Hybrid 1

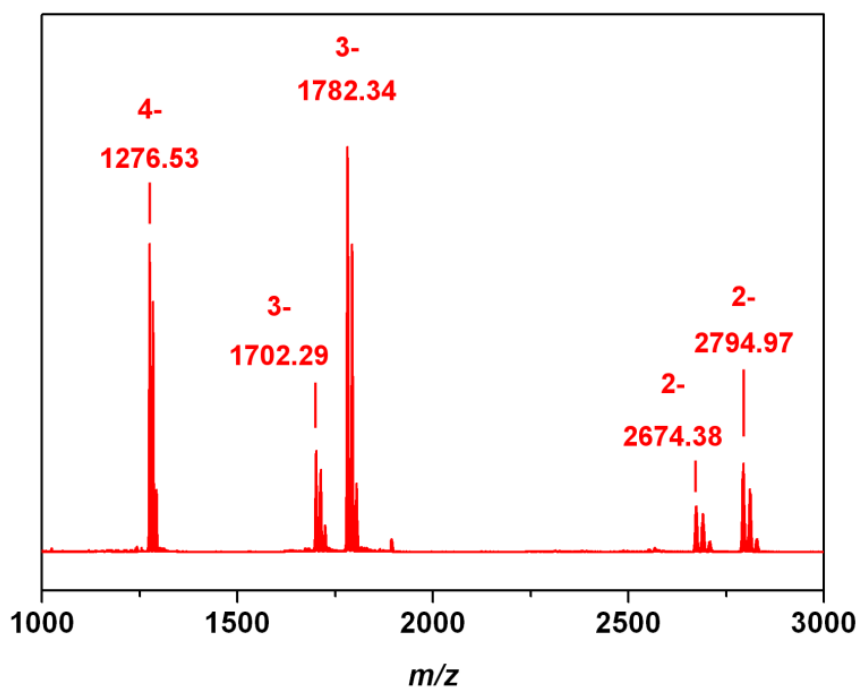

**Figure S4.** ESI-MS spectrum of POM Hybrid 2

**Table S1.** Detailed assignment of ESI-MS spectra for POM Hybrid 1.

| No. | Ion                                                                                                                                                                                                               | m/z<br>Calculated | m/z<br>Observed |
|-----|-------------------------------------------------------------------------------------------------------------------------------------------------------------------------------------------------------------------|-------------------|-----------------|
| 1   | $2\text{H}_2\text{O} + [(\text{SiW}_{11}\text{O}_{40})\{\text{Si}(\text{CH}_2)_3\text{NHCOC}_6\text{H}_4\text{N}_2\text{C}_6\text{H}_4\text{OC}_8\text{H}_{17}\}_2]^{4-}$                                         | 892.88            | 892.81          |
| 2   | $\text{HCOONa} + [(\text{SiW}_{11}\text{O}_{40})\{\text{Si}(\text{CH}_2)_3\text{NHCOC}_6\text{H}_4\text{N}_2\text{C}_6\text{H}_4\text{OC}_8\text{H}_{17}\}_2]^{4-}$                                               | 900.90            | 900.79          |
| 3   | $2\text{H}_2\text{O} + \text{HCOONa} + [(\text{SiW}_{11}\text{O}_{40})\{\text{Si}(\text{CH}_2)_3\text{NHCOC}_6\text{H}_4\text{N}_2\text{C}_6\text{H}_4\text{OC}_8\text{H}_{17}\}_2]^{4-}$                         | 909.89            | 909.53          |
| 4   | $4\text{H}_2\text{O} + \text{HCOONa} + [(\text{SiW}_{11}\text{O}_{40})\{\text{Si}(\text{CH}_2)_3\text{NHCOC}_6\text{H}_4\text{N}_2\text{C}_6\text{H}_4\text{OC}_8\text{H}_{17}\}_2]^{4-}$                         | 918.89            | 918.52          |
| 5   | $2\text{H}_2\text{O} + \{\text{H}[(\text{SiW}_{11}\text{O}_{40})\{\text{Si}(\text{CH}_2)_3\text{NHCOC}_6\text{H}_4\text{N}_2\text{C}_6\text{H}_4\text{OC}_8\text{H}_{17}\}_2]\}^{3-}$                             | 1190.35           | 1190.34         |
| 6   | $\text{HCOONa} + \{\text{H}[(\text{SiW}_{11}\text{O}_{40})\{\text{Si}(\text{CH}_2)_3\text{NHCOC}_6\text{H}_4\text{N}_2\text{C}_6\text{H}_4\text{OC}_8\text{H}_{17}\}_2]\}^{3-}$                                   | 1201.69           | 1201.65         |
| 7   | $2\text{H}_2\text{O} + \text{HCOONa} + \{\text{H}[(\text{SiW}_{11}\text{O}_{40})\{\text{Si}(\text{CH}_2)_3\text{NHCOC}_6\text{H}_4\text{N}_2\text{C}_6\text{H}_4\text{OC}_8\text{H}_{17}\}_2]\}^{3-}$             | 1213.52           | 1213.31         |
| 8   | $4\text{H}_2\text{O} + \text{HCOONa} + \{\text{H}[(\text{SiW}_{11}\text{O}_{40})\{\text{Si}(\text{CH}_2)_3\text{NHCOC}_6\text{H}_4\text{N}_2\text{C}_6\text{H}_4\text{OC}_8\text{H}_{17}\}_2]\}^{3-}$             | 1225.52           | 1225.30         |
| 9   | $2\text{H}_2\text{O} + \{(\text{TBA})[(\text{SiW}_{11}\text{O}_{40})\{\text{Si}(\text{CH}_2)_3\text{NHCOC}_6\text{H}_4\text{N}_2\text{C}_6\text{H}_4\text{OC}_8\text{H}_{17}\}_2]\}^{3-}$                         | 1271.34           | 1271.40         |
| 10  | $\text{HCOONa} + \{(\text{TBA})[(\text{SiW}_{11}\text{O}_{40})\{\text{Si}(\text{CH}_2)_3\text{NHCOC}_6\text{H}_4\text{N}_2\text{C}_6\text{H}_4\text{OC}_8\text{H}_{17}\}_2]\}^{3-}$                               | 1282.00           | 1282.05         |
| 11  | $2\text{H}_2\text{O} + \text{HCOONa} + \{(\text{TBA})[(\text{SiW}_{11}\text{O}_{40})\{\text{Si}(\text{CH}_2)_3\text{NHCOC}_6\text{H}_4\text{N}_2\text{C}_6\text{H}_4\text{OC}_8\text{H}_{17}\}_2]\}^{3-}$         | 1294.00           | 1294.04         |
| 12  | $4\text{H}_2\text{O} + \text{HCOONa} + \{(\text{TBA})[(\text{SiW}_{11}\text{O}_{40})\{\text{Si}(\text{CH}_2)_3\text{NHCOC}_6\text{H}_4\text{N}_2\text{C}_6\text{H}_4\text{OC}_8\text{H}_{17}\}_2]\}^{3-}$         | 1306.00           | 1306.02         |
| 13  | $2\text{H}_2\text{O} + \{(\text{TBA})\text{H}[(\text{SiW}_{11}\text{O}_{40})\{\text{Si}(\text{CH}_2)_3\text{NHCOC}_6\text{H}_4\text{N}_2\text{C}_6\text{H}_4\text{OC}_8\text{H}_{17}\}_2]\}^{2-}$                 | 1907.51           | 1907.48         |
| 14  | $\text{HCOONa} + \{(\text{TBA})\text{H}[(\text{SiW}_{11}\text{O}_{40})\{\text{Si}(\text{CH}_2)_3\text{NHCOC}_6\text{H}_4\text{N}_2\text{C}_6\text{H}_4\text{OC}_8\text{H}_{17}\}_2]\}^{2-}$                       | 1923.52           | 1923.44         |
| 15  | $2\text{H}_2\text{O} + \text{HCOONa} + \{(\text{TBA})\text{H}[(\text{SiW}_{11}\text{O}_{40})\{\text{Si}(\text{CH}_2)_3\text{NHCOC}_6\text{H}_4\text{N}_2\text{C}_6\text{H}_4\text{OC}_8\text{H}_{17}\}_2]\}^{2-}$ | 1941.51           | 1941.42         |
| 16  | $4\text{H}_2\text{O} + \text{HCOONa} + \{(\text{TBA})\text{H}[(\text{SiW}_{11}\text{O}_{40})\{\text{Si}(\text{CH}_2)_3\text{NHCOC}_6\text{H}_4\text{N}_2\text{C}_6\text{H}_4\text{OC}_8\text{H}_{17}\}_2]\}^{2-}$ | 1959.51           | 1959.40         |
| 17  | $2\text{H}_2\text{O} + \{(\text{TBA})_2[(\text{SiW}_{11}\text{O}_{40})\{\text{Si}(\text{CH}_2)_3\text{NHCOC}_6\text{H}_4\text{N}_2\text{C}_6\text{H}_4\text{OC}_8\text{H}_{17}\}_2]\}^{2-}$                       | 2028.23           | 2028.54         |
| 18  | $\text{HCOONa} + \{(\text{TBA})_2[(\text{SiW}_{11}\text{O}_{40})\{\text{Si}(\text{CH}_2)_3\text{NHCOC}_6\text{H}_4\text{N}_2\text{C}_6\text{H}_4\text{OC}_8\text{H}_{17}\}_2]\}^{2-}$                             | 2044.24           | 2044.52         |
| 19  | $2\text{H}_2\text{O} + \text{HCOONa} + \{(\text{TBA})_2[(\text{SiW}_{11}\text{O}_{40})\{\text{Si}(\text{CH}_2)_3\text{NHCOC}_6\text{H}_4\text{N}_2\text{C}_6\text{H}_4\text{OC}_8\text{H}_{17}\}_2]\}^{2-}$       | 2062.24           | 2062.52         |
| 20  | $4\text{H}_2\text{O} + \text{HCOONa} + \{(\text{TBA})_2[(\text{SiW}_{11}\text{O}_{40})\{\text{Si}(\text{CH}_2)_3\text{NHCOC}_6\text{H}_4\text{N}_2\text{C}_6\text{H}_4\text{OC}_8\text{H}_{17}\}_2]\}^{2-}$       | 2080.23           | 2080.48         |

**Table S2.** Detailed assignment of ESI-MS spectra for POM Hybrid 2.

| No. | Ion                                                                                                                                                                                                                                 | m/z        |          |
|-----|-------------------------------------------------------------------------------------------------------------------------------------------------------------------------------------------------------------------------------------|------------|----------|
|     |                                                                                                                                                                                                                                     | Calculated | Observed |
| 1   | $[(\text{SiW}_{11}\text{O}_{40})\{\text{Si}(\text{CH}_2)_3\text{NHCOC}_6\text{H}_3(\text{O}(\text{CH}_2)_{12}\text{OC}_{12}\text{H}_8\text{N}_2\text{OC}_8\text{H}_{17})_2\}_2]^{4-}$                                               | 1276.46    | 1276.53  |
| 2   | $2\text{H}_2\text{O} + [(\text{SiW}_{11}\text{O}_{40})\{\text{Si}(\text{CH}_2)_3\text{NHCOC}_6\text{H}_3(\text{O}(\text{CH}_2)_{12}\text{OC}_{12}\text{H}_8\text{N}_2\text{OC}_8\text{H}_{17})_2\}_2]^{4-}$                         | 1285.46    | 1285.52  |
| 3   | $4\text{H}_2\text{O} + [(\text{SiW}_{11}\text{O}_{40})\{\text{Si}(\text{CH}_2)_3\text{NHCOC}_6\text{H}_3(\text{O}(\text{CH}_2)_{12}\text{OC}_{12}\text{H}_8\text{N}_2\text{OC}_8\text{H}_{17})_2\}_2]^{4-}$                         | 1294.46    | 1294.50  |
| 4   | $\{\text{H}[(\text{SiW}_{11}\text{O}_{40})\{\text{Si}(\text{CH}_2)_3\text{NHCOC}_6\text{H}_3(\text{O}(\text{CH}_2)_{12}\text{OC}_{12}\text{H}_8\text{N}_2\text{OC}_8\text{H}_{17})_2\}_2]\}^{3-}$                                   | 1702.28    | 1702.29  |
| 5   | $2\text{H}_2\text{O} + \{\text{H}[(\text{SiW}_{11}\text{O}_{40})\{\text{Si}(\text{CH}_2)_3\text{NHCOC}_6\text{H}_3(\text{O}(\text{CH}_2)_{12}\text{OC}_{12}\text{H}_8\text{N}_2\text{OC}_8\text{H}_{17})_2\}_2]\}^{3-}$             | 1714.28    | 1714.27  |
| 6   | $4\text{H}_2\text{O} + \{\text{H}[(\text{SiW}_{11}\text{O}_{40})\{\text{Si}(\text{CH}_2)_3\text{NHCOC}_6\text{H}_3(\text{O}(\text{CH}_2)_{12}\text{OC}_{12}\text{H}_8\text{N}_2\text{OC}_8\text{H}_{17})_2\}_2]\}^{3-}$             | 1726.28    | 1726.26  |
| 7   | $\{(\text{TBA})[(\text{SiW}_{11}\text{O}_{40})\{\text{Si}(\text{CH}_2)_3\text{NHCOC}_6\text{H}_3(\text{O}(\text{CH}_2)_{12}\text{OC}_{12}\text{H}_8\text{N}_2\text{OC}_8\text{H}_{17})_2\}_2]\}^{3-}$                               | 1782.77    | 1782.34  |
| 8   | $2\text{H}_2\text{O} + \{(\text{TBA})[(\text{SiW}_{11}\text{O}_{40})\{\text{Si}(\text{CH}_2)_3\text{NHCOC}_6\text{H}_3(\text{O}(\text{CH}_2)_{12}\text{OC}_{12}\text{H}_8\text{N}_2\text{OC}_8\text{H}_{17})_2\}_2]\}^{3-}$         | 1794.77    | 1794.33  |
| 9   | $4\text{H}_2\text{O} + \{(\text{TBA})[(\text{SiW}_{11}\text{O}_{40})\{\text{Si}(\text{CH}_2)_3\text{NHCOC}_6\text{H}_3(\text{O}(\text{CH}_2)_{12}\text{OC}_{12}\text{H}_8\text{N}_2\text{OC}_8\text{H}_{17})_2\}_2]\}^{3-}$         | 1806.77    | 1806.32  |
| 10  | $\{(\text{TBA})\text{H}[(\text{SiW}_{11}\text{O}_{40})\{\text{Si}(\text{CH}_2)_3\text{NHCOC}_6\text{H}_3(\text{O}(\text{CH}_2)_{12}\text{OC}_{12}\text{H}_8\text{N}_2\text{OC}_8\text{H}_{17})_2\}_2]\}^{2-}$                       | 2674.65    | 2674.38  |
| 11  | $2\text{H}_2\text{O} + \{(\text{TBA})\text{H}[(\text{SiW}_{11}\text{O}_{40})\{\text{Si}(\text{CH}_2)_3\text{NHCOC}_6\text{H}_3(\text{O}(\text{CH}_2)_{12}\text{OC}_{12}\text{H}_8\text{N}_2\text{OC}_8\text{H}_{17})_2\}_2]\}^{2-}$ | 2692.65    | 2692.35  |
| 12  | $4\text{H}_2\text{O} + \{(\text{TBA})\text{H}[(\text{SiW}_{11}\text{O}_{40})\{\text{Si}(\text{CH}_2)_3\text{NHCOC}_6\text{H}_3(\text{O}(\text{CH}_2)_{12}\text{OC}_{12}\text{H}_8\text{N}_2\text{OC}_8\text{H}_{17})_2\}_2]\}^{2-}$ | 2710.65    | 2710.32  |
| 13  | $\{(\text{TBA})_2[(\text{SiW}_{11}\text{O}_{40})\{\text{Si}(\text{CH}_2)_3\text{NHCOC}_6\text{H}_3(\text{O}(\text{CH}_2)_{12}\text{OC}_{12}\text{H}_8\text{N}_2\text{OC}_8\text{H}_{17})_2\}_2]\}^{2-}$                             | 2795.38    | 2794.97  |
| 14  | $2\text{H}_2\text{O} + \{(\text{TBA})_2[(\text{SiW}_{11}\text{O}_{40})\{\text{Si}(\text{CH}_2)_3\text{NHCOC}_6\text{H}_3(\text{O}(\text{CH}_2)_{12}\text{OC}_{12}\text{H}_8\text{N}_2\text{OC}_8\text{H}_{17})_2\}_2]\}^{2-}$       | 2813.38    | 2812.95  |
| 15  | $4\text{H}_2\text{O} + \{(\text{TBA})_2[(\text{SiW}_{11}\text{O}_{40})\{\text{Si}(\text{CH}_2)_3\text{NHCOC}_6\text{H}_3(\text{O}(\text{CH}_2)_{12}\text{OC}_{12}\text{H}_8\text{N}_2\text{OC}_8\text{H}_{17})_2\}_2]\}^{2-}$       | 2831.38    | 2830.91  |



## 2 The DSC of POM Hybrids

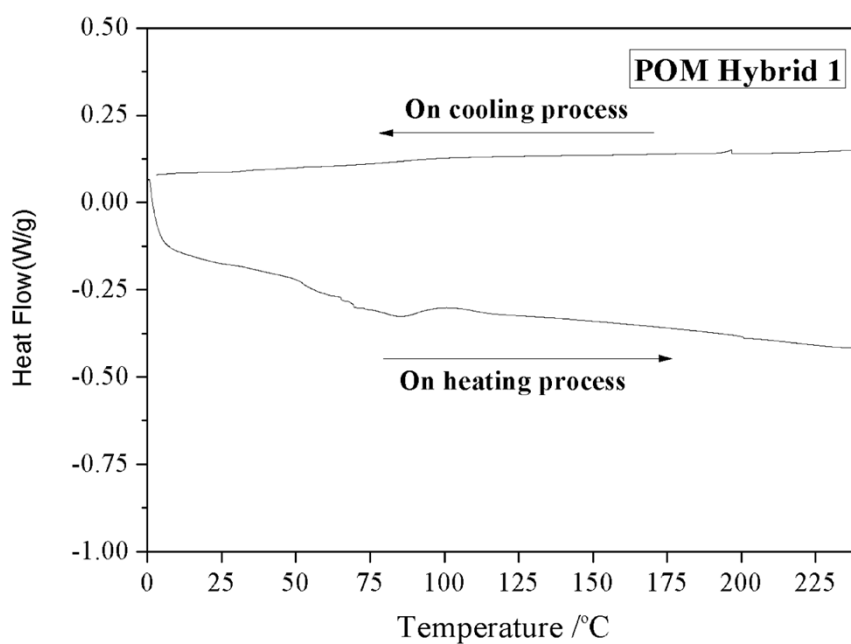

(a)

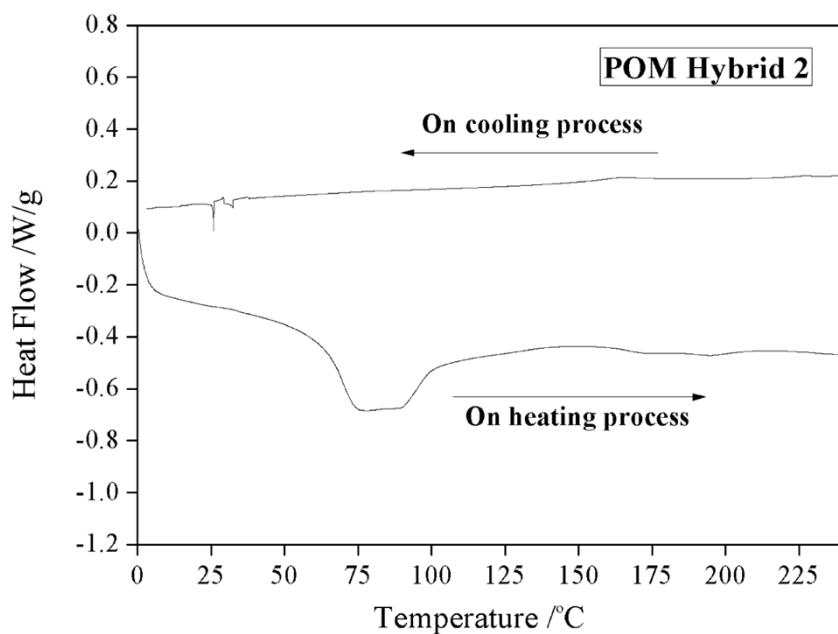

(b)

**Figure S5** DSC measurement of POM Hybrid 1 (a) and POM Hybrid 2 (b) on heating and cooling recycle. Note: the peaks observed at ca. 75 °C during the heating processes could be attributed to the loss of crystalliferous water molecules.

### 3 Measurement of elastic constants

**Table S3.** Temperature dependency of elastic constants in samples 1 and 2;  $K_{11}$  and  $K_{33}$ , elastic constant ratio;  $K_{33}/K_{11}$ , dielectric constant anisotropy;  $\Delta\epsilon$ , threshold voltage;  $V_{th}$

| BYLC-X                  |                  |          |            |             |       |              |              |                 |
|-------------------------|------------------|----------|------------|-------------|-------|--------------|--------------|-----------------|
| T-<br>Tc(°C)            | $\Delta\epsilon$ | $C_{//}$ | $C_{-eff}$ | $V_{th}(V)$ | $r_1$ | $K_{11}(PN)$ | $K_{33}(PN)$ | $K_{33}/K_{11}$ |
| -1.0                    | 25.7             | 5410     | 4410       | 31.9        | 10.59 | 13.7         | 13.9         | 1.01            |
| -2.0                    | 27.5             | 4890     | 3780       | 71.2        | 11.54 | 12.5         | 17.0         | 1.36            |
| -3.0                    | 34.83            | 4750     | 3350       | 70.8        | 18.33 | 15.7         | 25.2         | 1.61            |
| -4.0                    | 37.7             | 4560     | 3160       | 72.4        | 21.09 | 16.0         | 26.6         | 1.66            |
| -5.0                    | 35.8             | 4420     | 2850       | 73.1        | 19.49 | 15.5         | 35.0         | 2.26            |
| BYLC-X +3% POM Hybrid 1 |                  |          |            |             |       |              |              |                 |
| T-<br>Tc(°C)            | $\Delta\epsilon$ | $C_{//}$ | $C_{-eff}$ | $V_{th}(V)$ | $r_1$ | $K_{11}(PN)$ | $K_{33}(PN)$ | $K_{33}/K_{11}$ |
| -1.0                    | 49.8             | 9680     | 7630       | 87.4        | 10.36 | 30.0         | 64.0         | 2.13            |
| -2.0                    | 57.5             | 8800     | 6470       | 86.9        | 15.57 | 36.0         | 61.6         | 1.71            |
| -3.0                    | 58.9             | 8080     | 5720       | 87.1        | 17.69 | 40.0         | 64.5         | 1.61            |
| -4.0                    | 59.9             | 7490     | 5070       | 86.4        | 17.76 | 38.0         | 75.0         | 1.97            |
| -5.0                    | 58.5             | 6830     | 4480       | 85.3        | 20.37 | 39.5         | 66.0         | 1.67            |
| BYLC-X +3% POM Hybrid 2 |                  |          |            |             |       |              |              |                 |
| T-<br>Tc(°C)            | $\Delta\epsilon$ | $C_{//}$ | $C_{-eff}$ | $V_{th}(V)$ | $r_1$ | $K_{11}(PN)$ | $K_{33}(PN)$ | $K_{33}/K_{11}$ |
| -1.0                    | 37.0             | 8530     | 6770       | 99.3        | 6.676 | 35.3         | 196.0        | 5.55            |
| -2.0                    | 45.8             | 7990     | 5990       | 86.5        | 10.94 | 26.0         | 240.0        | 9.23            |
| -3.0                    | 45.1             | 7380     | 5440       | 95.2        | 11.43 | 34.1         | 260.0        | 7.62            |
| -4.0                    | 46.0             | 6880     | 4800       | 78.3        | 12.69 | 25.6         | 251.0        | 9.80            |
| -5.0                    | 45.1             | 6270     | 4320       | 85.0        | 13.05 | 32.3         | 230.0        | 7.12            |

#### References:

- 1 Bar-Nahum, H. Cohen, R. Neumann, *Inorg. Chem.*, 2003, **42**, 3677-3684.
- 2 J. Thiel, D. Yang, M. H. Rosnes, X. Liu, C. Yvon, S. E. Kelly, Y.-F. Song, D.-L. Long, L. Cronin, *Angew. Chem. Int. Ed.*, 2011, **50**, 8871-8875.
- 3 W. Chen, D. Ma, J. Yan, T. Boyd, L. Cronin, D.-L. Long, Y.-F. Song, *ChemPlusChem.*, 2013, **78**, 1226-1229.
